# Supplementary material for: Neural signatures of arbitration between Pavlovian and instrumental action selection
Source: PubMed Central journal article supplement (PMC7901778; doi:10.1371/journal.pcbi.1008553), 2021-02-10

**Guitart-Masip et al. (2012)**

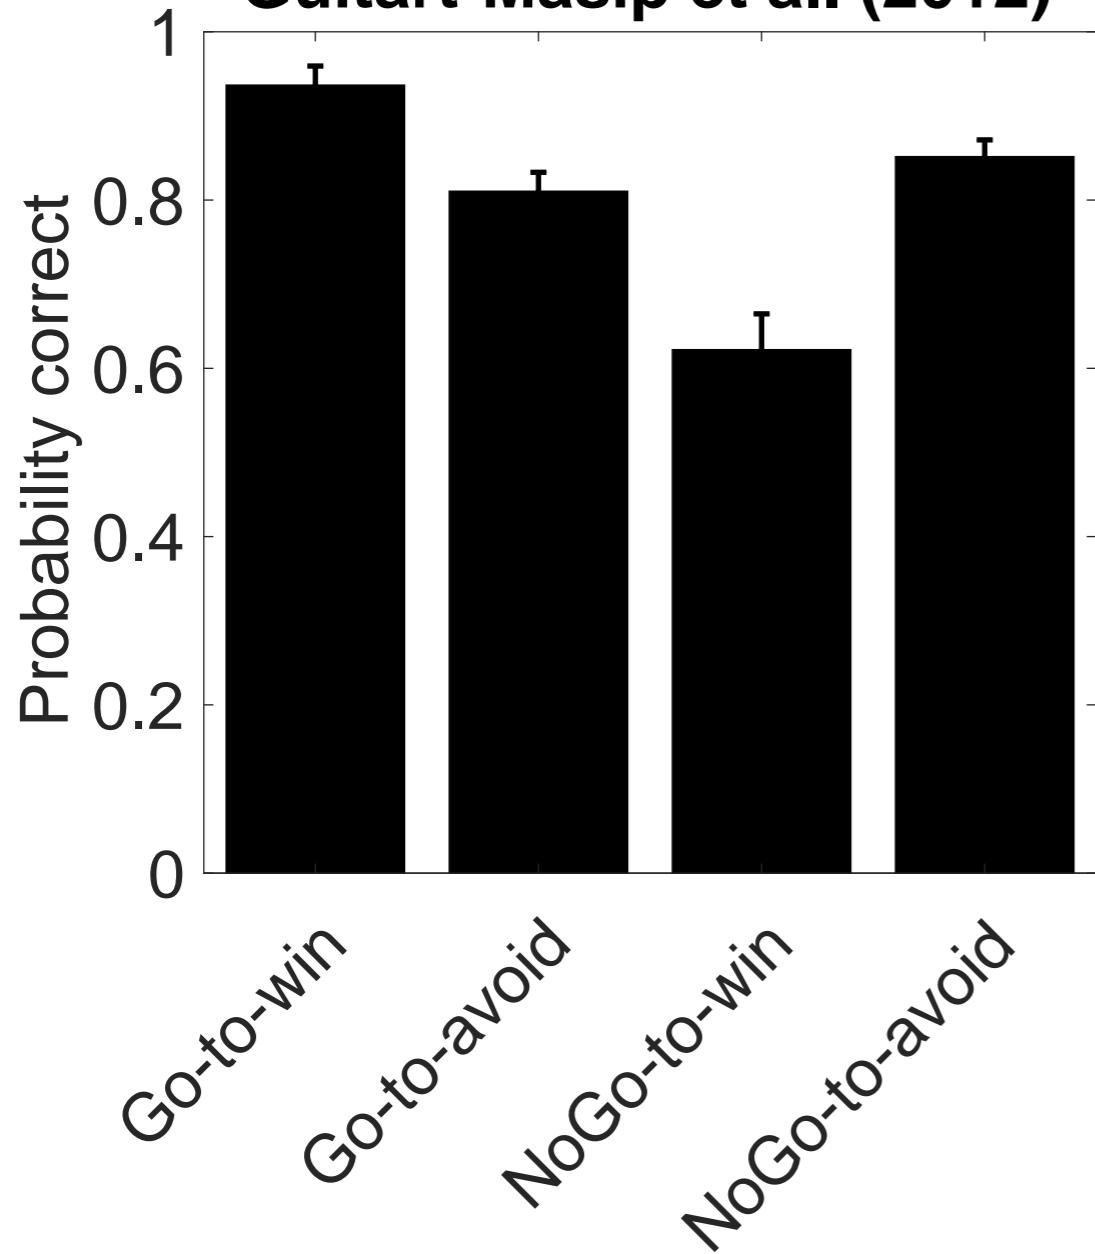

**Model simulation**

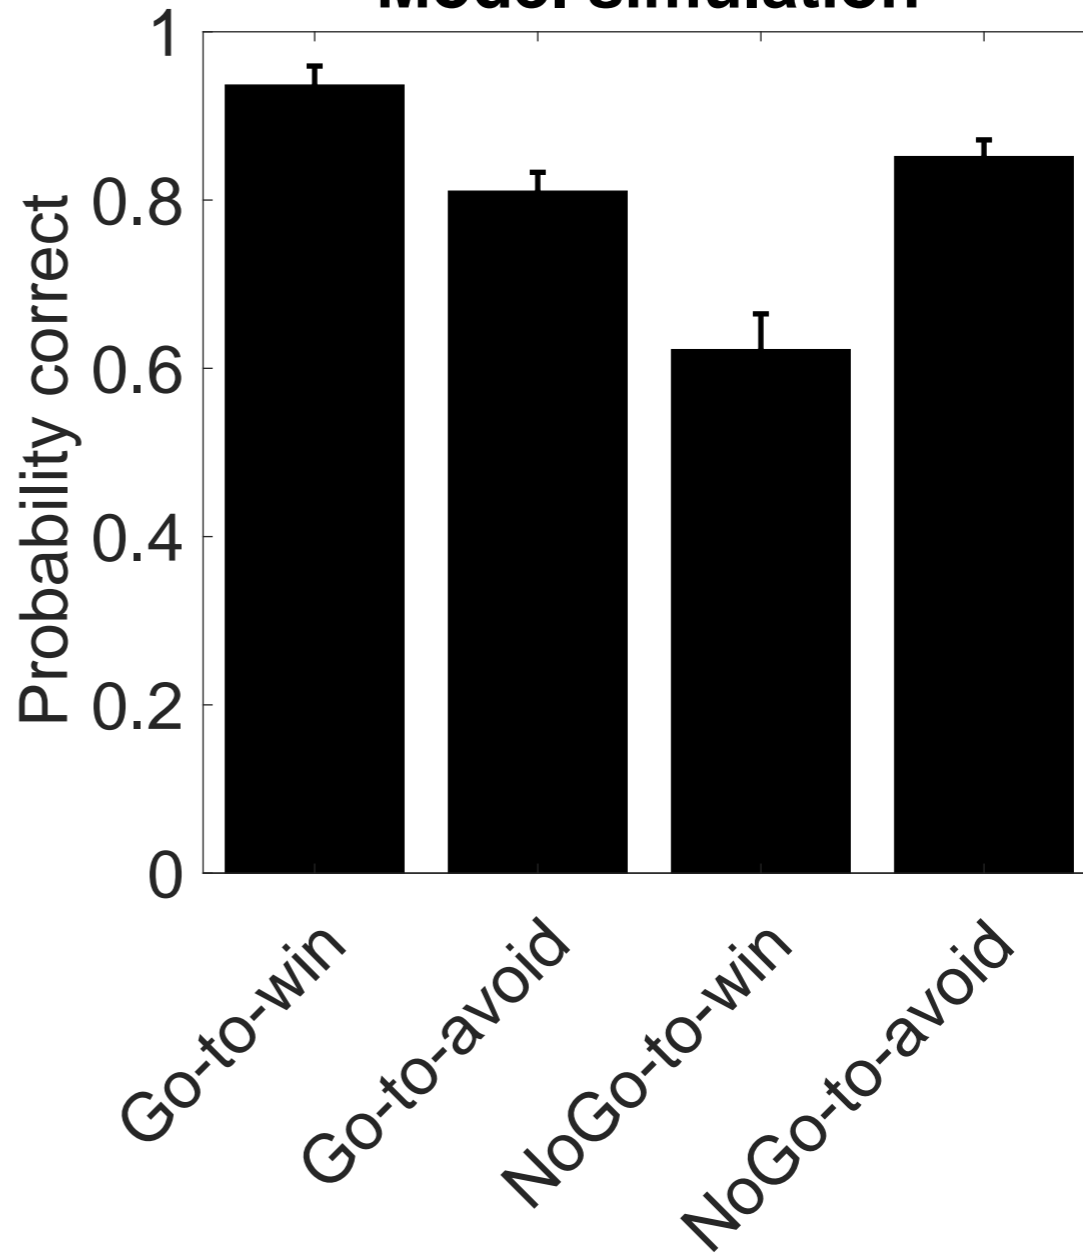

Supplement: pcbi.1008553.s001.pdf [file pcbi.1008553.s001.pdf]
