# Supplementary material for: Neural signatures of arbitration between Pavlovian and instrumental action selection
Source: PubMed Central journal article supplement (PMC7901778; doi:10.1371/journal.pcbi.1008553), 2021-02-10

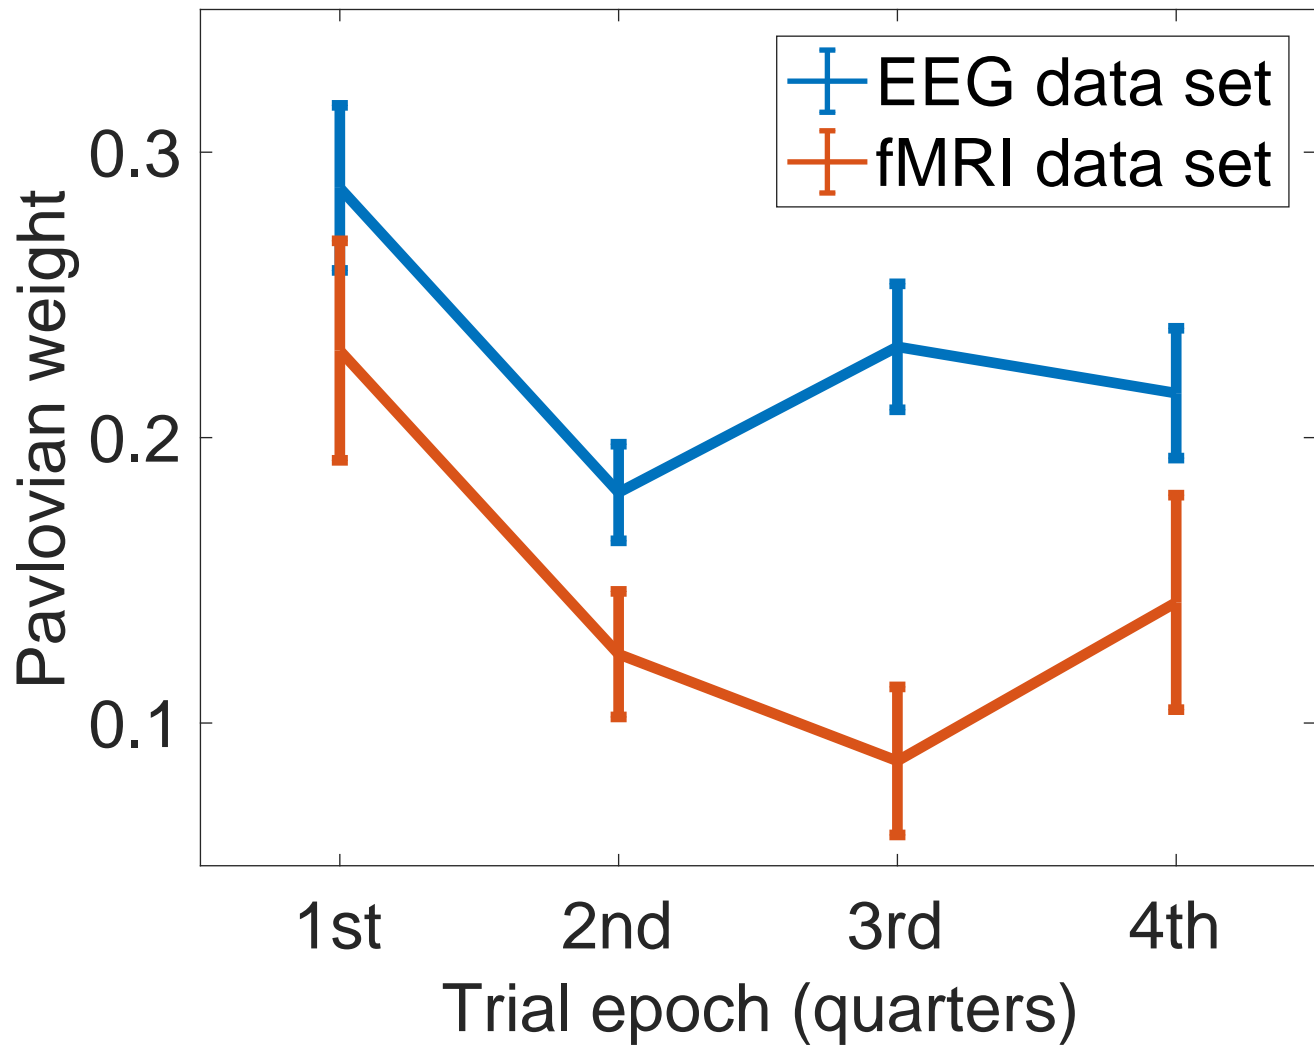

Supplement: pcbi.1008553.s002.pdf [file pcbi.1008553.s002.pdf]
